# Supplementary material
Source: MDPI journal article supplement (https://www.mdpi.com/2071-1050/14/24/16945)
Supplement: s1 [file s1]

# Energy Production from Cattle Manure within a Life Cycle Assessment Framework: Statistical Optimization of Co-Digestion, Pretreatment, and Thermal Conditions

A. Albalade-Ramirez<sup>1,2</sup>, M.M. Alcalá-Rodríguez<sup>1</sup>, L.R. Miramontes-Martínez<sup>1</sup>, A. Padilla-Rivera<sup>4</sup>, A. Estrada-Baltazar<sup>3</sup>, B.N. López-Hernández<sup>1,2</sup>, P. Rivas-García<sup>1,2\*</sup>

<sup>1</sup>*Departamento de Ingeniería Química, Facultad de Ciencias Químicas, Universidad Autónoma de Nuevo León. Av. Universidad S/N, Cd. Universitaria, zip 64451, San Nicolás de los Garza, Nuevo León, Mexico.*

<sup>2</sup>*Centro de Investigación en Biotecnología y Nanotecnología, Facultad de Ciencias Químicas, Universidad Autónoma de Nuevo León. Parque de Investigación e Innovación Tecnológica, km 10 Highway to the International Airport Mariano Escobedo, zip 66629 Apodaca, Nuevo León, Mexico.*

<sup>3</sup>*Departamento de Ingeniería Química, Instituto Tecnológico de Celaya, Av. Tecnológico y A. García Cubas S/N, C.P. 38010, Celaya, Guanajuato, Mexico.*

<sup>4</sup>*School of Architecture, Planning and Landscape, University of Calgary, 2500 University Drive NW, T2N 1N4, Calgary, Alberta, Canada.*

**Corresponding author e-mail:** [pasiano.rivasgr@uanl.edu.mx](mailto:pasiano.rivasgr@uanl.edu.mx)

## ***SUPPLEMENTARY MATERIAL***

### **CONTAINS**

**Table S1.** Characterization parameters for substrates and effluents.

**Figure S1.** Biochemical methane potential tests to assess the influence of CM pretreatment.

**Table S2** Categorization of the fruit and vegetable waste collected at the supply center

**Figure S2.** Boundary diagram of CM recovery scenario in mono-digestion under mesophilic conditions.

**Figure S3.** Representative diagram of the Applikon ® bioreactor for the inoculum demethanization process.

**Figure S4.** Image of the Applikon ® bioreactor for the inoculum demethanization process.

**Section S1.** Life cycle inventory

**Table S1.** Characterization parameters for each process.

| Parameter                                            | Reference                      | Inoculum | Substrate | BMP<br>effluents | Pretreatment<br>effluents |
|------------------------------------------------------|--------------------------------|----------|-----------|------------------|---------------------------|
| pH                                                   | NMX-AA-25-1984                 | X        | X         |                  | X                         |
| Humidity (%)                                         | NMX-AA-034-SCFI-<br>2015       | X        | X         |                  | X                         |
| Total solids (%)                                     | NMX-AA-034-SCFI-<br>2015       | X        | X         |                  | X                         |
| Volatile solids<br>(% TS)                            | NMX-AA-034-SCFI-<br>2015       | X        | X         |                  | X                         |
| Ash (% TS)                                           | NMX-AA-034-SCFI-<br>2015       | X        | X         |                  | X                         |
| Alkalinity (g<br>CaCO <sub>3</sub> L <sup>-1</sup> ) | NMX-AA-036-SCFI-<br>2001       | X        | X         | X                |                           |
| Volatile fatty<br>acids (g L <sup>-1</sup> )         | NMX-AA-036-SCFI-<br>2001       | X        | X         | X                |                           |
| Cellulose (g g<br>SV <sup>-1</sup> )                 | AOAC (1968) Vol. 51,<br>No. 4. | X        | X         |                  | X                         |
| Hemicellulose<br>(g g SV <sup>-1</sup> )             | AOAC (1968) Vol. 51,<br>No. 4. | X        | X         |                  | X                         |
| Lignin (g g SV <sup>-1</sup> )                       | AOAC (1968) Vol. 51,<br>No. 4. | X        | X         |                  | X                         |
| Total sugars<br>(mg mL <sup>-1</sup> )               | NMX-F-496-SCFI-2011            | X        | X         |                  | X                         |
| Total phenolic<br>compounds<br>(mg g <sup>-1</sup> ) | NMX-AA-050-SCFI-<br>2001       | X        | X         |                  | X                         |
| Total nitrogen<br>(mg g <sup>-1</sup> )              | EPA-821-R-004                  |          |           | X                |                           |

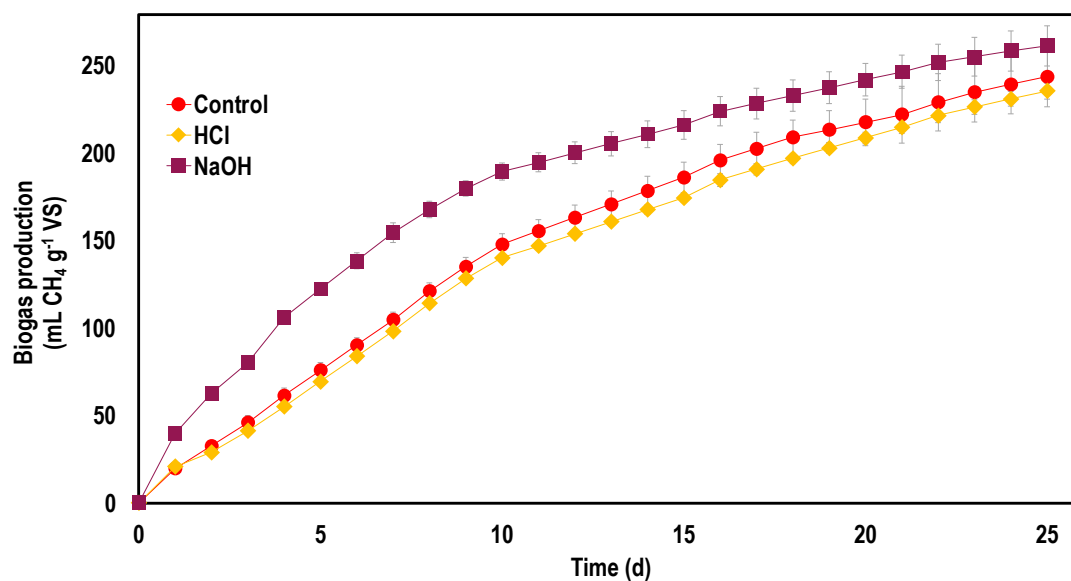

**Figure S1.** Methane yield for pretreatment selection study. The pretreatment process was conducted following the recommendations of Passos et al., (2017).

**Table S2** Categorization of the fruit and vegetable waste collected at the supply center

| FVW                 | % w w <sup>-1</sup> | FVW           | % w w <sup>-1</sup> |
|---------------------|---------------------|---------------|---------------------|
| Tomato              | 12.02               | Cabbage       | 3.55                |
| Mango               | 7.10                | Pineapple     | 3.28                |
| Banana              | 6.56                | Broccoli      | 2.73                |
| Apple               | 6.56                | Cucumber      | 2.19                |
| Watermelon          | 6.56                | Beetroot      | 1.64                |
| Green tomato        | 6.28                | Celery        | 1.64                |
| Green chilli pepper | 6.28                | Carrot        | 1.37                |
| Onion               | 6.01                | Pumpkin       | 0.82                |
| Orange              | 5.74                | Radish        | 0.82                |
| Potato              | 5.19                | Coconut Shell | 0.55                |

|                    |      |        |      |
|--------------------|------|--------|------|
| Cantaloupe         | 4.37 | Lemon  | 0.55 |
| Avocado            | 4.37 | Others | 0.27 |
| Prickly pear fruit | 3.55 |        |      |

FVW: Fruit and vegetable waste.

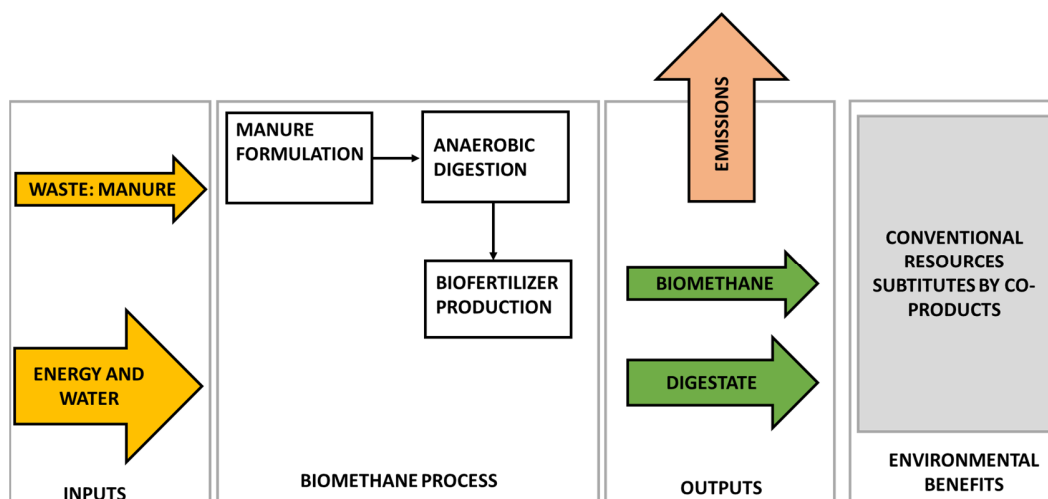

**Figure S2.** Boundary diagram of CM recovery scenario in mono-digestion under mesophilic conditions.

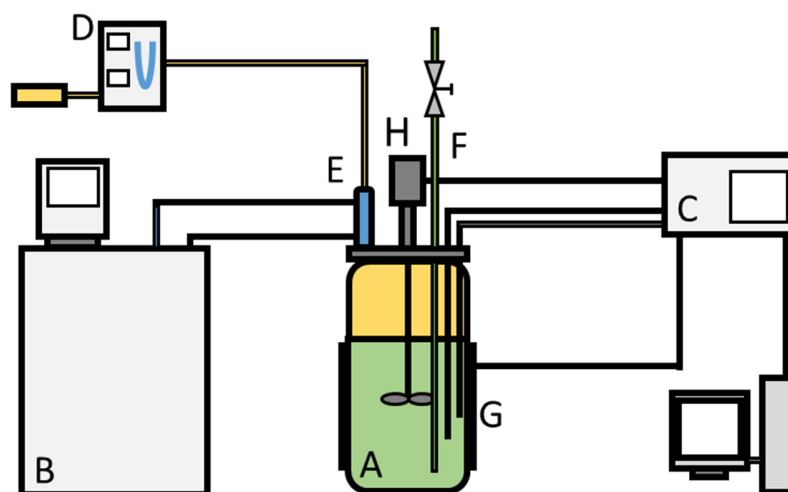

**Figure S3.** Representative diagram of the Applikon® bioreactor for the inoculum demethanization process. A) anaerobic digester B) temperature bath C) control panel D) biogas volumetric meter E) condenser F) valve for sampling G) heating mantle H) stirring motor.

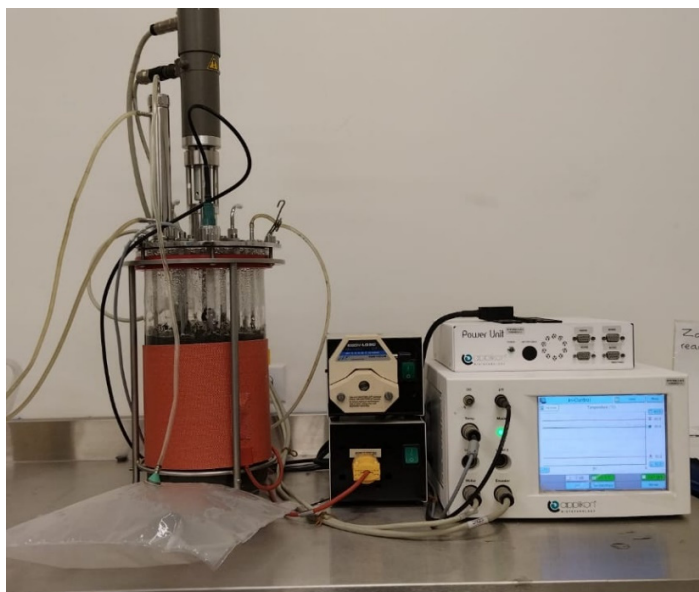

**Figure S4.** Image of the Applikon ® bioreactor for the inoculum demethanization process.

Section S1. Life cycle inventory.

| Table E1.1                             |          |          |
|----------------------------------------|----------|----------|
| <b><i>Pretreatment</i></b>             |          |          |
| <b><i>Substrate formulation</i></b>    |          |          |
| Distilled water                        | 1.79     | L/kgCM   |
| <b><i>Chemical agent</i></b>           |          |          |
| NaOH                                   | 0.0012   | kg/kgCM  |
| <b><i>Heating</i></b>                  |          |          |
| Electricity                            | 473.08   | kJ/kgCM  |
| <b><i>Anaerobic Digestion</i></b>      |          |          |
| <b><i>Mixture</i></b>                  |          |          |
| Inoculum                               | 4.03     | L/kgCM   |
| FVW                                    | 1.29     | kg/kgCM  |
| <b><i>Heating</i></b>                  |          |          |
| Electricity                            | 85.10    | kJ/kgCM  |
| <b><i>Effluent</i></b>                 |          |          |
| Digestate                              | 8.06     | L/kgCM   |
| <b><i>Methane production</i></b>       |          |          |
| Methane                                | 40.96    | L/kg CM  |
| CH <sub>4</sub> emissions              | 0.0005   | kg/kg CM |
|                                        | 0.26     |          |
| Electric production                    | 958.68   | kJ/kgCM  |
| Heat production                        | 516.21   | kJ/kgCM  |
| <b><i>Biofertilizer production</i></b> |          |          |
| <b><i>Drying</i></b>                   |          |          |
| Electricity                            | 235.70   | kJ/kgCM  |
| N emitted as NH <sub>3</sub>           | 2.56E-08 | kg/kgCM  |
| N emitted as N <sub>2</sub> O          | 2.99E-08 | kg/kgCM  |
| <b><i>Biofertilizer</i></b>            |          |          |
| Total Nitrogen                         | 2.13E-05 | kg/kgCM  |
| Urea substitution                      | 4.63E-05 | kg/kgCM  |

| Table E2.1                             |             |         |
|----------------------------------------|-------------|---------|
| <b><i>Pretreatment</i></b>             |             |         |
| <b><i>Substrate formulation</i></b>    |             |         |
| Distilled water                        | 1.22        | L/kgCM  |
| <b><i>Chemical agent</i></b>           |             |         |
| NaOH                                   | 0.012       | kg/kgCM |
| <b><i>Heating</i></b>                  |             |         |
| Electricity                            | 473.08      | kJ/kgCM |
| <b><i>Anaerobic Digestion</i></b>      |             |         |
| <b><i>Mixture</i></b>                  |             |         |
| Inoculum                               | 4.033333333 | L/kgCM  |
| FVW                                    | 1.292735043 | kg/kgCM |
| <b><i>Heating</i></b>                  |             |         |
| Electricity                            | 85.10177601 | kJ/kgCM |
| <b><i>Effluent</i></b>                 |             |         |
| Digestate                              | 8.066666667 | L/kgCM  |
| <b><i>Methane production</i></b>       |             |         |
| Methane                                | 64.5672     | L/kg CM |
|                                        |             | kg/kg   |
| CH <sub>4</sub> emissions              | 0.000922389 | CM      |
| Electric production                    | 1435.328856 | kJ/kgCM |
| Heat production                        | 772.869384  | kJ/kgCM |
| <b><i>Biofertilizer production</i></b> |             |         |
| <b><i>Drying</i></b>                   |             |         |
| Electricity                            | 235.7017259 | kJ/kgCM |
| N emitted as NH <sub>3</sub>           | 2.20108E-05 | kg/kgCM |
| N emitted as N <sub>2</sub> O          | 2.56792E-05 | kg/kgCM |
| <b><i>Biofertilizer</i></b>            |             |         |
| Total Nitrogen                         | 0.018342307 | kg/kgCM |
| Urea substitution                      | 3.97881E-05 | kg/kgCM |

| Table E3.1                             |             |           |
|----------------------------------------|-------------|-----------|
| <b>Pretreatment</b>                    |             |           |
| <b><u>Substrate formulation</u></b>    |             |           |
| Distilled water                        | 0.504132231 | ̄ L/kgCM  |
| <b><u>Chemical agent</u></b>           |             |           |
| NaOH                                   | 0.0012      | ̄ kg/kgCM |
| <b><u>Heating</u></b>                  |             |           |
| Electricity                            | 545.6187778 | kJ/kgCM   |
| <b><u>Anaerobic Digestion</u></b>      |             |           |
| <b><u>Mixture</u></b>                  |             |           |
| Inoculum                               | 2.016666667 | ̄ L/kgCM  |
| FVW                                    | 0           | kg/kgCM   |
| <b><u>Heating</u></b>                  |             |           |
| Electricity                            | 42.30090667 | ̄ kJ/kgCM |
| <b><u>Effluent</u></b>                 |             |           |
| Digestate                              | 4.033333333 | ̄ L/kgCM  |
| <b><u>Methane production</u></b>       |             |           |
| Methane                                | 23.9832     | ̄ L/kg CM |
|                                        |             | kg/kg     |
| CH <sub>4</sub> emissions              | 0.000342617 | CM        |
| <br>                                   |             |           |
| Electric production                    | 533.146536  | kJ/kgCM   |
| Heat production                        | 287.078904  | kJ/kgCM   |
| <b><u>Biofertilizer production</u></b> |             |           |
| <b><u>Drying</u></b>                   |             |           |
| Electricity                            | 235.7017259 | ̄ kJ/kgCM |
| N emitted as NH <sub>3</sub>           | 7.16104E-06 | kg/kgCM   |
| N emitted as N <sub>2</sub> O          | 8.35454E-06 | kg/kgCM   |
| <b><u>Biofertilizer</u></b>            |             |           |
| Total Nitrogen                         | 0.005967531 | ̄ kg/kgCM |
| Urea substitution                      | 1.29448E-05 | kg/kgCM   |

| Table E4.1                             |             |           |
|----------------------------------------|-------------|-----------|
| <b>Pretreatment</b>                    |             |           |
| <b><u>Substrate formulation</u></b>    |             |           |
| Distilled water                        | 0.504132231 | ̄ L/kgCM  |
| <b><u>Chemical agent</u></b>           |             |           |
| NaOH                                   | 0.012       | ̄ kg/kgCM |
| <b><u>Heating</u></b>                  |             |           |
| Electricity                            | 473.0822281 | kJ/kgCM   |
| <b><u>Anaerobic Digestion</u></b>      |             |           |
| <b><u>Mixture</u></b>                  |             |           |
| Inoculum                               | 2.016666667 | ̄ L/kgCM  |
| FVW                                    | 0           | kg/kgCM   |
| <b><u>Heating</u></b>                  |             |           |
| Electricity                            | 42.30090667 | ̄ kJ/kgCM |
| <b><u>Effluent</u></b>                 |             |           |
| Digestate                              | 4.033333333 | ̄ L/kgCM  |
| <b><u>Methane production</u></b>       |             |           |
| Methane                                | 22.4316     | ̄ L/kg CM |
|                                        |             | kg/kg     |
| CH <sub>4</sub> emissions              | 0.000320451 | CM        |
| <br>                                   |             |           |
| Electric production                    | 498.654468  | kJ/kgCM   |
| Heat production                        | 268.506252  | kJ/kgCM   |
| <b><u>Biofertilizer production</u></b> |             |           |
| <b><u>Drying</u></b>                   |             |           |
| Electricity                            | 117.850863  | ̄ kJ/kgCM |
| N emitted as NH <sub>3</sub>           | 1.33421E-05 | kg/kgCM   |
| N emitted as N <sub>2</sub> O          | 1.55658E-05 | kg/kgCM   |
| <b><u>Biofertilizer</u></b>            |             |           |
| Total Nitrogen                         | 0.011118453 | ̄ kg/kgCM |
| Urea substitution                      | 2.41181E-05 | kg/kgCM   |

| Table E5.1 |
|------------|
|------------|



|                                        |             |          |
|----------------------------------------|-------------|----------|
| <b><u>Pretreatment</u></b>             |             |          |
| <b><u>Substrate formulation</u></b>    |             |          |
| Distilled water                        | 1.228063855 | ̄L/kgCM  |
| <b><u>Chemical agent</u></b>           |             |          |
| NaOH                                   | 0.0012      | ̄kg/kgCM |
| <b><u>Heating</u></b>                  |             |          |
| Electricity                            | 473.0822281 | kJ/kgCM  |
| <b><u>Anaerobic Digestion</u></b>      |             |          |
| <b><u>Mixture</u></b>                  |             |          |
| Inoculum                               | 4.033333333 | ̄L/kgCM  |
| FVW                                    | 1.292735043 | kg/kgCM  |
| <b><u>Heating</u></b>                  |             |          |
| Electricity                            | 759.2747361 | ̄kJ/kgCM |
| <b><u>Effluent</u></b>                 |             |          |
| Digestate                              | 8.066666667 | ̄L/kgCM  |
| <b><u>Methane production</u></b>       |             |          |
| Methane                                | 32.0304     | ̄L/kg CM |
|                                        |             | kg/kg    |
| CH <sub>4</sub> emissions              | 0.000457577 | CM       |
| <br>                                   |             |          |
| Electric production                    | 712.035792  | kJ/kgCM  |
| Heat production                        | 383.403888  | kJ/kgCM  |
| <b><u>Biofertilizer production</u></b> |             |          |
| <b><u>Drying</u></b>                   |             |          |
| Electricity                            | 235.7017259 | ̄kJ/kgCM |
| N emitted as NH <sub>3</sub>           | 2.03524E-05 | kg/kgCM  |
| N emitted as N <sub>2</sub> O          | 2.37445E-05 | kg/kgCM  |
| <b><u>Biofertilizer</u></b>            |             |          |
| Total Nitrogen                         | 0.016960352 | ̄kg/kgCM |
| Urea substitution                      | 3.67904E-05 | kg/kgCM  |

| Table E6.1                             |             |          |
|----------------------------------------|-------------|----------|
| <b><u>Pretreatment</u></b>             |             |          |
| <b><u>Substrate formulation</u></b>    |             |          |
| Distilled water                        | 1.228063855 | ̄L/kgCM  |
| <b><u>Chemical agent</u></b>           |             |          |
| NaOH                                   | 0.012       | ̄kg/kgCM |
| <b><u>Heating</u></b>                  |             |          |
| Electricity                            | 473.0834562 | kJ/kgCM  |
| <b><u>Anaerobic Digestion</u></b>      |             |          |
| <b><u>Mixture</u></b>                  |             |          |
| Inoculum                               | 4.033333333 | ̄L/kgCM  |
| FVW                                    | 1.292735043 | kg/kgCM  |
| <b><u>Heating</u></b>                  |             |          |
| Electricity                            | 741.5976941 | ̄kJ/kgCM |
| <b><u>Effluent</u></b>                 |             |          |
| Digestate                              | 8.066666667 | ̄L/kgCM  |
| <b><u>Methane production</u></b>       |             |          |
| Methane                                | 43.1256     | ̄L/kg CM |
|                                        |             | kg/kg    |
| CH <sub>4</sub> emissions              | 0.00061608  | CM       |
| <br>                                   |             |          |
| Electric production                    | 958.682088  | kJ/kgCM  |
| Heat production                        | 516.213432  | kJ/kgCM  |
| <b><u>Biofertilizer production</u></b> |             |          |
| <b><u>Drying</u></b>                   |             |          |
| Electricity                            | 235.7017259 | ̄kJ/kgCM |
| N emitted as NH <sub>3</sub>           | 2.33676E-05 | kg/kgCM  |
| N emitted as N <sub>2</sub> O          | 2.72622E-05 | kg/kgCM  |
| <b><u>Biofertilizer</u></b>            |             |          |
| Total Nitrogen                         | 0.019472997 | ̄kg/kgCM |
| Urea substitution                      | 4.22408E-05 | kg/kgCM  |

Table E7.1

|                                        |             |           |
|----------------------------------------|-------------|-----------|
| <b><u>Pretreatment</u></b>             |             |           |
| <b><u>Substrate formulation</u></b>    |             |           |
| Distilled water                        | 0.504132231 | ̄ L/kgCM  |
| <b><u>Chemical agent</u></b>           |             |           |
| NaOH                                   | 0.0012      | ̄ kg/kgCM |
| <b><u>Heating</u></b>                  |             |           |
| Electricity                            | 473.0822281 | kJ/kgCM   |
| <b><u>Anaerobic Digestion</u></b>      |             |           |
| <b><u>Mixture</u></b>                  |             |           |
| Inoculum                               | 2.016666667 | ̄ L/kgCM  |
| FVW                                    | 0           | kg/kgCM   |
| <b><u>Heating</u></b>                  |             |           |
| Electricity                            | 376.8875733 | ̄ kJ/kgCM |
| <b><u>Effluent</u></b>                 |             |           |
| Digestate                              | 4.033333333 | ̄ L/kgCM  |
| <b><u>Methane production</u></b>       |             |           |
| Methane                                | 18.486      | ̄ L/kg CM |
| CH <sub>4</sub> emissions              | 0.000264086 | kg/kg CM  |
| Electric production                    | 410.94378   |           |
| Heat production                        | 221.27742   | kJ/kgCM   |
| <b><u>Biofertilizer production</u></b> |             |           |
| <b><u>Drying</u></b>                   |             |           |
| Electricity                            | 117.850863  |           |
| N emitted as NH <sub>3</sub>           | 7.08566E-06 | kJ/kgCM   |
| N emitted as N <sub>2</sub> O          | 8.2666E-06  | kg/kgCM   |
| <b><u>Biofertilizer</u></b>            |             |           |
| Total Nitrogen                         | 0.005904715 | kg/kgCM   |
| Urea substitution                      | 1.28085E-05 | ̄ kg/kgCM |

| Table E8.1                             |             |           |
|----------------------------------------|-------------|-----------|
| <b><u>Pretreatment</u></b>             |             |           |
| <b><u>Substrate formulation</u></b>    |             |           |
| Distilled water                        | 0.504132231 | ̄ L/kgCM  |
| <b><u>Chemical agent</u></b>           |             |           |
| NaOH                                   | 0.012       | ̄ kg/kgCM |
| <b><u>Heating</u></b>                  |             |           |
| Electricity                            | 473.0822281 | kJ/kgCM   |
| <b><u>Anaerobic Digestion</u></b>      |             |           |
| <b><u>Mixture</u></b>                  |             |           |
| Inoculum                               | 2.016666667 | ̄ L/kgCM  |
| FVW                                    | 0           | kg/kgCM   |
| <b><u>Heating</u></b>                  |             |           |
| Electricity                            | 376.8875733 | ̄ kJ/kgCM |
| <b><u>Effluent</u></b>                 |             |           |
| Digestate                              | 4.033333333 | ̄ L/kgCM  |
| <b><u>Methane production</u></b>       |             |           |
| Methane                                | 23.4228     | ̄ L/kg CM |
| CH <sub>4</sub> emissions              | 0.000334611 | kg/kgCM   |
| Electric production                    | 520.688844  | kJ/kgCM   |
| Heat production                        | 280.370916  | kJ/kgCM   |
| <b><u>Biofertilizer production</u></b> |             |           |
| <b><u>Drying</u></b>                   |             |           |
| Electricity                            | 117.850863  | ̄ kJ/kgCM |
| N emitted as NH <sub>3</sub>           | 9.04552E-06 | kg/kgCM   |
| N emitted as N <sub>2</sub> O          | 1.05531E-05 | kg/kgCM   |
| <b><u>Biofertilizer</u></b>            |             |           |
| Total Nitrogen                         | 0.007537934 | ̄ kg/kgCM |
| Urea substitution                      | 1.63513E-05 | L/kgCM    |

| Table E9.1                             |             |          |
|----------------------------------------|-------------|----------|
| <b><u>Pretreatment</u></b>             |             |          |
| <b><u>Substrate formulation</u></b>    |             |          |
| Distilled water                        | 0.745442773 | ̄L/kgCM  |
| <b><u>Chemical agent</u></b>           |             |          |
| NaOH                                   | 0.0012      | ̄kg/kgCM |
| <b><u>Heating</u></b>                  |             |          |
| Electricity                            | 473.0826375 | kJ/kgCM  |
| <b><u>Anaerobic Digestion</u></b>      |             |          |
| <b><u>Mixture</u></b>                  |             |          |
| Inoculum                               | 2.688888889 | ̄L/kgCM  |
| FVW                                    | 0.430911681 | kg/kgCM  |
| <b><u>Heating</u></b>                  |             |          |
| Electricity                            | 281.225543  | ̄kJ/kgCM |
| <b><u>Effluent</u></b>                 |             |          |
| Digestate                              | 5.377777778 | ̄L/kgCM  |
| <b><u>Methane production</u></b>       |             |          |
| Methane                                | 52.7408     | ̄L/kg CM |
| CH <sub>4</sub> emissions              | 0.00075344  | kg/kgCM  |
| Electric production                    | 1172.427984 | kJ/kgCM  |
| Heat production                        | 631.307376  | kJ/kgCM  |
| <b><u>Biofertilizer production</u></b> |             |          |
| <b><u>Drying</u></b>                   |             |          |
| Electricity                            | 157.134484  | ̄kJ/kgCM |
| N emitted as NH <sub>3</sub>           | 1.24627E-05 | kg/kgCM  |
| N emitted as N <sub>2</sub> O          | 1.45398E-05 | kg/kgCM  |
| <b><u>Biofertilizer</u></b>            |             |          |
| Total Nitrogen                         | 0.010385599 | ̄kg/kgCM |
| Urea substitution                      | 2.25284E-05 | L/kgCM   |

| Table E10.1                            |             |          |
|----------------------------------------|-------------|----------|
| <b><u>Pretreatment</u></b>             |             |          |
| <b><u>Substrate formulation</u></b>    |             |          |
| Distilled water                        | 0.745442773 | ̄L/kgCM  |
| <b><u>Chemical agent</u></b>           |             |          |
| NaOH                                   | 0.012       | ̄kg/kgCM |
| <b><u>Heating</u></b>                  |             |          |
| Electricity                            | 473.0826375 | kJ/kgCM  |
| <b><u>Anaerobic Digestion</u></b>      |             |          |
| <b><u>Mixture</u></b>                  |             |          |
| Inoculum                               | 2.688888889 | ̄L/kgCM  |
| FVW                                    | 0.430911681 | kg/kgCM  |
| <b><u>Heating</u></b>                  |             |          |
| Electricity                            | 281.225543  | ̄kJ/kgCM |
| <b><u>Effluent</u></b>                 |             |          |
| Digestate                              | 5.377777778 | ̄L/kgCM  |
| <b><u>Methane production</u></b>       |             |          |
| Methane                                | 50.7392     | ̄L/kg CM |
| CH <sub>4</sub> emissions              | 0.000724846 | kg/kgCM  |
| Electric production                    | 1127.932416 | kJ/kgCM  |
| Heat production                        | 607.348224  | kJ/kgCM  |
| <b><u>Biofertilizer production</u></b> |             |          |
| <b><u>Drying</u></b>                   |             |          |
| Electricity                            | 157.134484  | ̄kJ/kgCM |
| N emitted as NH <sub>3</sub>           | 1.61814E-05 | kg/kgCM  |
| N emitted as N <sub>2</sub> O          | 1.88783E-05 | kg/kgCM  |
| <b><u>Biofertilizer</u></b>            |             |          |
| Total Nitrogen                         | 0.013484527 | ̄kg/kgCM |
| Urea substitution                      | 2.92506E-05 | L/kgCM   |

| Table E11.1                            |             |          |
|----------------------------------------|-------------|----------|
| <b><u>Pretreatment</u></b>             |             |          |
| <b><u>Substrate formulation</u></b>    |             |          |
| Distilled water                        | 1.228063855 | ̄L/kgCM  |
| <b><u>Chemical agent</u></b>           |             |          |
| NaOH                                   | 0.0066      | ̄kg/kgCM |
| <b><u>Heating</u></b>                  |             |          |
| Electricity                            | 473.0834562 | kJ/kgCM  |
| <b><u>Anaerobic Digestion</u></b>      |             |          |
| <b><u>Mixture</u></b>                  |             |          |
| Inoculum                               | 4.033333333 | ̄L/kgCM  |
| FVW                                    | 1.292735043 | kg/kgCM  |
| <b><u>Heating</u></b>                  |             |          |
| Electricity                            | 422.188256  | ̄kJ/kgCM |
| <b><u>Effluent</u></b>                 |             |          |
| Digestate                              | 8.066666667 | ̄L/kgCM  |
| <b><u>Methane production</u></b>       |             |          |
| Methane                                | 79.3968     | ̄L/kg CM |
| CH <sub>4</sub> emissions              | 0.00113424  | kg/kgCM  |
|                                        | 0.00113424  |          |
| Electric production                    | 1764.990864 | kJ/kgCM  |
| Heat production                        | 950.379696  | kJ/kgCM  |
| <b><u>Biofertilizer production</u></b> |             |          |
| <b><u>Drying</u></b>                   |             |          |
| Electricity                            | 235.7017259 | ̄kJ/kgCM |
| N emitted as NH <sub>3</sub>           | 2.02017E-08 | kg/kgCM  |
| N emitted as N <sub>2</sub> O          | 2.35686E-08 | kg/kgCM  |
| <b><u>Biofertilizer</u></b>            |             |          |
| Total Nitrogen                         | 1.68347E-05 | ̄kg/kgCM |
| Urea substitution                      | 3.65178E-08 | L/kgCM   |

| Table E12.1                            |            |          |
|----------------------------------------|------------|----------|
| <b><u>Pretreatment</u></b>             |            |          |
| <b><u>Substrate formulation</u></b>    |            |          |
| Distilled water                        | 0.50413223 | ̄L/kgCM  |
| <b><u>Chemical agent</u></b>           |            |          |
| NaOH                                   | 0.0066     | ̄kg/kgCM |
| <b><u>Heating</u></b>                  |            |          |
| Electricity                            | 473.082228 | kJ/kgCM  |
| <b><u>Anaerobic Digestion</u></b>      |            |          |
| <b><u>Mixture</u></b>                  |            |          |
| Inoculum                               | 2.01666667 | ̄L/kgCM  |
| FVW                                    | 0          | kg/kgCM  |
| <b><u>Heating</u></b>                  |            |          |
| Electricity                            | 209.59424  | ̄kJ/kgCM |
| <b><u>Effluent</u></b>                 |            |          |
| Digestate                              | 4.03333333 | ̄L/kgCM  |
| <b><u>Methane production</u></b>       |            |          |
| Methane                                | 38.91      | ̄L/kg CM |
| CH <sub>4</sub> emissions              | 0.00055586 | kg/kgCM  |
|                                        |            |          |
| Electric production                    | 864.9693   | kJ/kgCM  |
| Heat production                        | 465.7527   | kJ/kgCM  |
| <b><u>Biofertilizer production</u></b> |            |          |
| <b><u>Drying</u></b>                   |            |          |
| Electricity                            | 117.850863 | ̄kJ/kgCM |
| N emitted as NH <sub>3</sub>           | 9.837E-06  | kg/kgCM  |
| N emitted as N <sub>2</sub> O          | 1.1477E-05 | kg/kgCM  |
| <b><u>Biofertilizer</u></b>            |            |          |
| Total Nitrogen                         | 0.0081975  | ̄kg/kgCM |
| Urea substitution                      | 1.7782E-05 | L/kgCM   |

| Table E13.1                            |             |          |
|----------------------------------------|-------------|----------|
| <b><u>Pretreatment</u></b>             |             |          |
| <b><u>Substrate formulation</u></b>    |             |          |
| Distilled water                        | 0.745442773 | ̄L/kgCM  |
| <b><u>Chemical agent</u></b>           |             |          |
| NaOH                                   | 0.0066      | ̄kg/kgCM |
| <b><u>Heating</u></b>                  |             |          |
| Electricity                            | 473.0826375 | kJ/kgCM  |
| <b><u>Anaerobic Digestion</u></b>      |             |          |
| <b><u>Mixture</u></b>                  |             |          |
| Inoculum                               | 2.688888889 | ̄L/kgCM  |
| FVW                                    | 0.430911681 | kg/kgCM  |
| <b><u>Heating</u></b>                  |             |          |
| Electricity                            | 56.69563494 | ̄kJ/kgCM |
| <b><u>Effluent</u></b>                 |             |          |
| Digestate                              | 5.377777778 | ̄L/kgCM  |
| <b><u>Methane production</u></b>       |             |          |
| Methane                                | 45.088      | ̄L/kg CM |
| CH <sub>4</sub> emissions              | 0.000644114 | kg/kgCM  |
| <br>                                   |             |          |
| Electric production                    | 1002.30624  | kJ/kgCM  |
| Heat production                        | 539.70336   | kJ/kgCM  |
| <b><u>Biofertilizer production</u></b> |             |          |
| <b><u>Drying</u></b>                   |             |          |
| Electricity                            | 157.134484  | ̄kJ/kgCM |
| N emitted as NH <sub>3</sub>           | 1.3116E-05  | kg/kgCM  |
| N emitted as N <sub>2</sub> O          | 1.5302E-05  | kg/kgCM  |
| <b><u>Biofertilizer</u></b>            |             |          |
| Total Nitrogen                         | 0.010930005 | ̄kg/kgCM |
| Urea substitution                      | 2.37093E-05 | L/kgCM   |

| Table E14.1                            |             |          |
|----------------------------------------|-------------|----------|
| <b><u>Pretreatment</u></b>             |             |          |
| <b><u>Substrate formulation</u></b>    |             |          |
| Distilled water                        | 0.745442773 | ̄L/kgCM  |
| <b><u>Chemical agent</u></b>           |             |          |
| NaOH                                   | 0.0066      | ̄kg/kgCM |
| <b><u>Heating</u></b>                  |             |          |
| Electricity                            | 473.0826375 | kJ/kgCM  |
| <b><u>Anaerobic Digestion</u></b>      |             |          |
| <b><u>Mixture</u></b>                  |             |          |
| Inoculum                               | 2.688888889 | ̄L/kgCM  |
| FVW                                    | 0.430911681 | kg/kgCM  |
| <b><u>Heating</u></b>                  |             |          |
| Electricity                            | 505.755451  | ̄kJ/kgCM |
| <b><u>Effluent</u></b>                 |             |          |
| Digestate                              | 5.377777778 | ̄L/kgCM  |
| <b><u>Methane production</u></b>       |             |          |
| Methane                                | 34.5504     | ̄L/kg CM |
| CH <sub>4</sub> emissions              | 0.000493577 | kg/kgCM  |
| <br>                                   |             |          |
| Electric production                    | 768.055392  | kJ/kgCM  |
| Heat production                        | 413.568288  | kJ/kgCM  |
| <b><u>Biofertilizer production</u></b> |             |          |
| <b><u>Drying</u></b>                   |             |          |
| Electricity                            | 157.134484  | ̄kJ/kgCM |
| N emitted as NH <sub>3</sub>           | 1.3116E-05  | kg/kgCM  |
| N emitted as N <sub>2</sub> O          | 1.5302E-05  | kg/kgCM  |
| <b><u>Biofertilizer</u></b>            |             |          |
| Total Nitrogen                         | 0.010930005 | ̄kg/kgCM |
| Urea substitution                      | 2.37093E-05 | L/kgCM   |

| Table E15.1                            |             |           |
|----------------------------------------|-------------|-----------|
| <b><u>Pretreatment</u></b>             |             |           |
| <b><u>Substrate formulation</u></b>    |             |           |
| Distilled water                        | 0.745442773 | ̄ L/kgCM  |
| <b><u>Chemical agent</u></b>           |             |           |
| NaOH                                   | 0.0066      | ̄ kg/kgCM |
| <b><u>Heating</u></b>                  |             |           |
| Electricity                            | 473.0826375 | kJ/kgCM   |
| <b><u>Anaerobic Digestion</u></b>      |             |           |
| <b><u>Mixture</u></b>                  |             |           |
| Inoculum                               | 2.688888889 | ̄ L/kgCM  |
| FVW                                    | 0.430911681 | kg/kgCM   |
| <b><u>Heating</u></b>                  |             |           |
| Electricity                            | 281.225543  | ̄ kJ/kgCM |
| <b><u>Effluent</u></b>                 |             |           |
| Digestate                              | 5.377777778 | ̄ L/kgCM  |
| <b><u>Methane production</u></b>       |             |           |
| Methane                                | 56.1536     | ̄ L/kg CM |
| CH <sub>4</sub> emissions              | 0.000802194 | kg/kgCM   |
| Electric production                    | 1248.294528 | kJ/kgCM   |
| Heat production                        | 672.158592  | kJ/kgCM   |
| <b><u>Biofertilizer production</u></b> |             |           |
| <b><u>Drying</u></b>                   |             |           |
| Electricity                            | 157.134484  | ̄ kJ/kgCM |
| N emitted as NH <sub>3</sub>           | 1.3116E-05  | kg/kgCM   |
| N emitted as N <sub>2</sub> O          | 1.5302E-05  | kg/kgCM   |
| <b><u>Biofertilizer</u></b>            |             |           |
| Total Nitrogen                         | 0.010930005 | ̄ kg/kgCM |
| Urea substitution                      | 2.37093E-05 | L/kgCM    |

| Table E1.2                             |             |           |
|----------------------------------------|-------------|-----------|
| <b><u>Pretreatment</u></b>             |             |           |
| <b><u>Substrate formulation</u></b>    |             |           |
| Distilled water                        | 1.796867274 | ̄ L/kgCM  |
| <b><u>Chemical agent</u></b>           |             |           |
| NaOH                                   | 0.024       | ̄ kg/kgCM |
| <b><u>Heating</u></b>                  |             |           |
| Electricity                            | 473.0834562 | kJ/kgCM   |
| <b><u>Anaerobic Digestion</u></b>      |             |           |
| <b><u>Mixture</u></b>                  |             |           |
| Inoculum                               | 4.033333333 | ̄ L/kgCM  |
| FVW                                    | 1.292735043 | kg/kgCM   |
| <b><u>Heating</u></b>                  |             |           |
| Electricity                            | 253.645016  | ̄ kJ/kgCM |
| <b><u>Effluent</u></b>                 |             |           |
| Digestate                              | 8.066666667 | ̄ L/kgCM  |
| <b><u>Methane production</u></b>       |             |           |
| Methane                                | 41.16768    | ̄ L/kg CM |
| CH <sub>4</sub> emissions              | 0.00058811  | kg/kgCM   |
|                                        | 0.26758992  |           |
| Electric production                    | 963.323712  | kJ/kgCM   |
| Heat production                        | 518.712768  | kJ/kgCM   |
| <b><u>Biofertilizer production</u></b> |             |           |
| <b><u>Drying</u></b>                   |             |           |
| Electricity                            | 235.7017259 | ̄ kJ/kgCM |
| N emitted as NH <sub>3</sub>           | 4.52276E-09 | kg/kgCM   |
| N emitted as N <sub>2</sub> O          | 5.27655E-09 | kg/kgCM   |
| <b><u>Biofertilizer</u></b>            |             |           |
| Total Nitrogen                         | 3.76897E-06 | ̄ kg/kgCM |
| Urea substitution                      | 8.17563E-06 | L/kgCM    |

| Table E2.2                             |             |           |
|----------------------------------------|-------------|-----------|
| <b>Pretreatment</b>                    |             |           |
| <b><u>Substrate formulation</u></b>    |             |           |
| Distilled water                        | 1.228063855 | ̄ L/kgCM  |
| <b><u>Chemical agent</u></b>           |             |           |
| NaOH                                   | 0.012       | ̄ kg/kgCM |
| <b><u>Heating</u></b>                  |             |           |
| Electricity                            | 473.0834562 | kJ/kgCM   |
| <b><u>Anaerobic Digestion</u></b>      |             |           |
| <b><u>Mixture</u></b>                  |             |           |
| Inoculum                               | 4.033333333 | ̄ L/kgCM  |
| FVW                                    | 1.292735043 | kg/kgCM   |
| <b><u>Heating</u></b>                  |             |           |
| Electricity                            | 253.645016  | ̄ kJ/kgCM |
| <b><u>Effluent</u></b>                 |             |           |
| Digestate                              | 8.066666667 | ̄ L/kgCM  |
| <b><u>Methane production</u></b>       |             |           |
| Methane                                | 51.1152     | ̄ L/kg CM |
| CH <sub>4</sub> emissions              | 0.000730217 | kg/kgCM   |
| Electric production                    | 1136.290896 | kJ/kgCM   |
| Heat production                        | 611.848944  | kJ/kgCM   |
| <b><u>Biofertilizer production</u></b> |             |           |
| <b><u>Drying</u></b>                   |             |           |
| Electricity                            | 235.7017259 | ̄ kJ/kgCM |
| N emitted as NH <sub>3</sub>           | 4.52276E-06 | kg/kgCM   |
| N emitted as N <sub>2</sub> O          | 5.27655E-06 | kg/kgCM   |
| <b><u>Biofertilizer</u></b>            |             |           |
| Total Nitrogen                         | 0.003768967 | ̄ kg/kgCM |
| Urea substitution                      | 8.17563E-06 | L/kgCM    |

| Table E3.2                             |             |           |
|----------------------------------------|-------------|-----------|
| <b>Pretreatment</b>                    |             |           |
| <b><u>Substrate formulation</u></b>    |             |           |
| Distilled water                        | 5.675072402 | ̄ L/kgCM  |
| <b><u>Chemical agent</u></b>           |             |           |
| NaOH                                   | 0.024       | ̄ kg/kgCM |
| <b><u>Heating</u></b>                  |             |           |
| Electricity                            | 570.1805556 | kJ/kgCM   |
| <b><u>Anaerobic Digestion</u></b>      |             |           |
| <b><u>Mixture</u></b>                  |             |           |
| Inoculum                               | 10.08333333 | ̄ L/kgCM  |
| FVW                                    | 5.170940171 | kg/kgCM   |
| <b><u>Heating</u></b>                  |             |           |
| Electricity                            | 634.26934   | ̄ kJ/kgCM |
| <b><u>Effluent</u></b>                 |             |           |
| Digestate                              | 20.16666667 | ̄ L/kgCM  |
| <b><u>Methane production</u></b>       |             |           |
| Methane                                | 10.9344     | ̄ L/kg CM |
| CH <sub>4</sub> emissions              | 0.000156206 | kg/kgCM   |
| Electric production                    | 243.071712  | kJ/kgCM   |
| Heat production                        | 130.884768  | kJ/kgCM   |
| <b><u>Biofertilizer production</u></b> |             |           |
| <b><u>Drying</u></b>                   |             |           |
| Electricity                            | 235.7017259 | ̄ kJ/kgCM |
| N emitted as NH <sub>3</sub>           | 1.20607E-05 | kg/kgCM   |
| N emitted as N <sub>2</sub> O          | 1.40708E-05 | kg/kgCM   |
| <b><u>Biofertilizer</u></b>            |             |           |
| Total Nitrogen                         | 0.010050579 | ̄ kg/kgCM |
| Urea substitution                      | 2.18017E-05 | L/kgCM    |

| Table E4.2                             |             |          |
|----------------------------------------|-------------|----------|
| <b><u>Pretreatment</u></b>             |             |          |
| <b><u>Substrate formulation</u></b>    |             |          |
| Distilled water                        | 3.399858727 | ̄L/kgCM  |
| <b><u>Chemical agent</u></b>           |             |          |
| NaOH                                   | 0.012       | ̄kg/kgCM |
| <b><u>Heating</u></b>                  |             |          |
| Electricity                            | 473.081614  | kJ/kgCM  |
| <b><u>Anaerobic Digestion</u></b>      |             |          |
| <b><u>Mixture</u></b>                  |             |          |
| Inoculum                               | 1.008333333 | ̄L/kgCM  |
| FVW                                    | 5.170940171 | kg/kgCM  |
| <b><u>Heating</u></b>                  |             |          |
| Electricity                            | 63.41139576 | ̄kJ/kgCM |
| <b><u>Effluent</u></b>                 |             |          |
| Digestate                              | 2.016666667 | ̄L/kgCM  |
| <b><u>Methane production</u></b>       |             |          |
| Methane                                | 11.0844     | ̄L/kg CM |
| CH <sub>4</sub> emissions              | 0.000158349 | kg/kgCM  |
| <br>                                   |             |          |
| Electric production                    | 246.406212  | kJ/kgCM  |
| Heat production                        | 132.680268  | kJ/kgCM  |
| <b><u>Biofertilizer production</u></b> |             |          |
| <b><u>Drying</u></b>                   |             |          |
| Electricity                            | 58.92543148 | ̄kJ/kgCM |
| N emitted as NH <sub>3</sub>           | 1.20607E-06 | kg/kgCM  |
| N emitted as N <sub>2</sub> O          | 1.40708E-06 | kg/kgCM  |
| <b><u>Biofertilizer</u></b>            |             |          |
| Total Nitrogen                         | 0.001005058 | ̄kg/kgCM |
| Urea substitution                      | 2.18017E-06 | L/kgCM   |

| Table E5.2                             |             |          |
|----------------------------------------|-------------|----------|
| <b><u>Pretreatment</u></b>             |             |          |
| <b><u>Substrate formulation</u></b>    |             |          |
| Distilled water                        | 1.228063855 | ̄L/kgCM  |
| <b><u>Chemical agent</u></b>           |             |          |
| NaOH                                   | 0.024       | ̄kg/kgCM |
| <b><u>Heating</u></b>                  |             |          |
| Electricity                            | 473.081614  | kJ/kgCM  |
| <b><u>Anaerobic Digestion</u></b>      |             |          |
| <b><u>Mixture</u></b>                  |             |          |
| Inoculum                               | 4.033333333 | ̄L/kgCM  |
| FVW                                    | 1.292735043 | kg/kgCM  |
| <b><u>Heating</u></b>                  |             |          |
| Electricity                            | 590.7314961 | ̄kJ/kgCM |
| <b><u>Effluent</u></b>                 |             |          |
| Digestate                              | 8.066666667 | ̄L/kgCM  |
| <b><u>Methane production</u></b>       |             |          |
| Methane                                | 19.9248     | ̄L/kg CM |
| CH <sub>4</sub> emissions              | 0.00028464  | kg/kgCM  |
| <br>                                   |             |          |
| Electric production                    | 442.928304  | kJ/kgCM  |
| Heat production                        | 238.499856  | kJ/kgCM  |
| <b><u>Biofertilizer production</u></b> |             |          |
| <b><u>Drying</u></b>                   |             |          |
| Electricity                            | 235.7017259 | ̄kJ/kgCM |
| N emitted as NH <sub>3</sub>           | 4.52276E-06 | kg/kgCM  |
| N emitted as N <sub>2</sub> O          | 5.27655E-06 | kg/kgCM  |
| <b><u>Biofertilizer</u></b>            |             |          |
| Total Nitrogen                         | 0.003768967 | ̄kg/kgCM |
| Urea substitution                      | 8.17563E-06 | L/kgCM   |



| Table E6.2                             |             |           |
|----------------------------------------|-------------|-----------|
| <b>Pretreatment</b>                    |             |           |
| <b><u>Substrate formulation</u></b>    |             |           |
| Distilled water                        | 1.228063855 | ̄ L/kgCM  |
| <b><u>Chemical agent</u></b>           |             |           |
| NaOH                                   | 0.012       | ̄ kg/kgCM |
| <b><u>Heating</u></b>                  |             |           |
| Electricity                            | 473.0834562 | kJ/kgCM   |
| <b><u>Anaerobic Digestion</u></b>      |             |           |
| <b><u>Mixture</u></b>                  |             |           |
| Inoculum                               | 4.033333333 | ̄ L/kgCM  |
| FVW                                    | 1.292735043 | kg/kgCM   |
| <b><u>Heating</u></b>                  |             |           |
| Electricity                            | 573.0544541 | ̄ kJ/kgCM |
| <b><u>Effluent</u></b>                 |             |           |
| Digestate                              | 8.066666667 | ̄ L/kgCM  |
| <b><u>Methane production</u></b>       |             |           |
| Methane                                | 16.9872     | ̄ L/kg CM |
| CH <sub>4</sub> emissions              | 0.000242674 | kg/kgCM   |
| <br>                                   |             |           |
| Electric production                    | 377.625456  | kJ/kgCM   |
| Heat production                        | 203.336784  | kJ/kgCM   |
| <b><u>Biofertilizer production</u></b> |             |           |
| <b><u>Drying</u></b>                   |             |           |
| Electricity                            | 235.7017259 | ̄ kJ/kgCM |
| N emitted as NH <sub>3</sub>           | 4.52276E-06 | kg/kgCM   |
| N emitted as N <sub>2</sub> O          | 5.27655E-06 | kg/kgCM   |
| <b><u>Biofertilizer</u></b>            |             |           |
| Total Nitrogen                         | 0.003768967 | ̄ kg/kgCM |
| Urea substitution                      | 8.17563E-06 | L/kgCM    |

| Table E7.2                             |             |           |
|----------------------------------------|-------------|-----------|
| <b>Pretreatment</b>                    |             |           |
| <b><u>Substrate formulation</u></b>    |             |           |
| Distilled water                        | 29.46139719 | ̄ L/kgCM  |
| <b><u>Chemical agent</u></b>           |             |           |
| NaOH                                   | 0.024       | ̄ kg/kgCM |
| <b><u>Heating</u></b>                  |             |           |
| Electricity                            | 473.0871404 | kJ/kgCM   |
| <b><u>Anaerobic Digestion</u></b>      |             |           |
| <b><u>Mixture</u></b>                  |             |           |
| Inoculum                               | 10.08333333 | ̄ L/kgCM  |
| FVW                                    | 51.70940171 | kg/kgCM   |
| <b><u>Heating</u></b>                  |             |           |
| Electricity                            | 1477.249984 | ̄ kJ/kgCM |
| <b><u>Effluent</u></b>                 |             |           |
| Digestate                              | 20.16666667 | ̄ L/kgCM  |
| <b><u>Methane production</u></b>       |             |           |
| Methane                                | 9.6504      | ̄ L/kg CM |
| CH <sub>4</sub> emissions              | 0.000137863 | kg/kgCM   |
| <br>                                   |             |           |
| Electric production                    | 214.528392  | kJ/kgCM   |
| Heat production                        | 115.515288  | kJ/kgCM   |
| <b><u>Biofertilizer production</u></b> |             |           |
| <b><u>Drying</u></b>                   |             |           |
| Electricity                            | 589.2543148 | ̄ kJ/kgCM |
| N emitted as NH <sub>3</sub>           | 1.20607E-05 | kg/kgCM   |
| N emitted as N <sub>2</sub> O          | 1.40708E-05 | kg/kgCM   |
| <b><u>Biofertilizer</u></b>            |             |           |
| Total Nitrogen                         | 0.010050579 | ̄ kg/kgCM |
| Urea substitution                      | 2.18017E-05 | L/kgCM    |

| Table E8.2                             |             |          |
|----------------------------------------|-------------|----------|
| <b><u>Pretreatment</u></b>             |             |          |
| <b><u>Substrate formulation</u></b>    |             |          |
| Distilled water                        | 29.46139719 | ̄L/kgCM  |
| <b><u>Chemical agent</u></b>           |             |          |
| NaOH                                   | 0.012       | ̄kg/kgCM |
| <b><u>Heating</u></b>                  |             |          |
| Electricity                            | 473.0871404 | kJ/kgCM  |
| <b><u>Anaerobic Digestion</u></b>      |             |          |
| <b><u>Mixture</u></b>                  |             |          |
| Inoculum                               | 10.08333333 | ̄L/kgCM  |
| FVW                                    | 51.70940171 | kg/kgCM  |
| <b><u>Heating</u></b>                  |             |          |
| Electricity                            | 1477.249984 | ̄kJ/kgCM |
| <b><u>Effluent</u></b>                 |             |          |
| Digestate                              | 20.16666667 | ̄L/kgCM  |
| <b><u>Methane production</u></b>       |             |          |
| Methane                                | 10.2564     | ̄L/kg CM |
| CH <sub>4</sub> emissions              | 0.00014652  | kg/kgCM  |
| <br>                                   |             |          |
| Electric production                    | 227.999772  | kJ/kgCM  |
| Heat production                        | 122.769108  | kJ/kgCM  |
| <b><u>Biofertilizer production</u></b> |             |          |
| <b><u>Drying</u></b>                   |             |          |
| Electricity                            | 589.2543148 | ̄kJ/kgCM |
| N emitted as NH <sub>3</sub>           | 1.20607E-05 | kg/kgCM  |
| N emitted as N <sub>2</sub> O          | 1.40708E-05 | kg/kgCM  |
| <b><u>Biofertilizer</u></b>            |             |          |
| Total Nitrogen                         | 0.010050579 | ̄kg/kgCM |
| Urea substitution                      | 2.18017E-05 | L/kgCM   |

| Table E9.2                             |             |          |
|----------------------------------------|-------------|----------|
| <b><u>Pretreatment</u></b>             |             |          |
| <b><u>Substrate formulation</u></b>    |             |          |
| Distilled water                        | 1.951995479 | ̄L/kgCM  |
| <b><u>Chemical agent</u></b>           |             |          |
| NaOH                                   | 0.024       | ̄kg/kgCM |
| <b><u>Heating</u></b>                  |             |          |
| Electricity                            | 473.0846843 | kJ/kgCM  |
| <b><u>Anaerobic Digestion</u></b>      |             |          |
| <b><u>Mixture</u></b>                  |             |          |
| Inoculum                               | 6.05        | ̄L/kgCM  |
| FVW                                    | 2.585470085 | kg/kgCM  |
| <b><u>Heating</u></b>                  |             |          |
| Electricity                            | 633.4003484 | ̄kJ/kgCM |
| <b><u>Effluent</u></b>                 |             |          |
| Digestate                              | 12.1        | ̄L/kgCM  |
| <b><u>Methane production</u></b>       |             |          |
| Methane                                | 11.6944     | ̄L/kg CM |
| CH <sub>4</sub> emissions              | 0.000167063 | kg/kgCM  |
| <br>                                   |             |          |
| Electric production                    | 259.966512  | kJ/kgCM  |
| Heat production                        | 139.981968  | kJ/kgCM  |
| <b><u>Biofertilizer production</u></b> |             |          |
| <b><u>Drying</u></b>                   |             |          |
| Electricity                            | 353.5525889 | ̄kJ/kgCM |
| N emitted as NH <sub>3</sub>           | 7.23642E-06 | kg/kgCM  |
| N emitted as N <sub>2</sub> O          | 8.44249E-06 | kg/kgCM  |
| <b><u>Biofertilizer</u></b>            |             |          |
| Total Nitrogen                         | 0.006030348 | ̄kg/kgCM |
| Urea substitution                      | 1.3081E-05  | L/kgCM   |

| Table E10.2                            |             |          |
|----------------------------------------|-------------|----------|
| <b><u>Pretreatment</u></b>             |             |          |
| <b><u>Substrate formulation</u></b>    |             |          |
| Distilled water                        | 1.951995479 | ̄L/kgCM  |
| <b><u>Chemical agent</u></b>           |             |          |
| NaOH                                   | 0.012       | ̄kg/kgCM |
| <b><u>Heating</u></b>                  |             |          |
| Electricity                            | 473.0846843 | kJ/kgCM  |
| <b><u>Anaerobic Digestion</u></b>      |             |          |
| <b><u>Mixture</u></b>                  |             |          |
| Inoculum                               | 6.05        | ̄L/kgCM  |
| FVW                                    | 2.585470085 | kg/kgCM  |
| <b><u>Heating</u></b>                  |             |          |
| Electricity                            | 633.4003484 | ̄kJ/kgCM |
| <b><u>Effluent</u></b>                 |             |          |
| Digestate                              | 12.1        | ̄L/kgCM  |
| <b><u>Methane production</u></b>       |             |          |
| Methane                                | 11.776      | ̄L/kg CM |
| CH <sub>4</sub> emissions              | 0.000168229 | kg/kgCM  |
| Electric production                    | 261.78048   | kJ/kgCM  |
| Heat production                        | 140.95872   | kJ/kgCM  |
| <b><u>Biofertilizer production</u></b> |             |          |
| <b><u>Drying</u></b>                   |             |          |
| Electricity                            | 353.5525889 | ̄kJ/kgCM |
| N emitted as NH <sub>3</sub>           | 8.14097E-06 | kg/kgCM  |
| N emitted as N <sub>2</sub> O          | 9.4978E-06  | kg/kgCM  |
| <b><u>Biofertilizer</u></b>            |             |          |
| Total Nitrogen                         | 0.006784141 | ̄kg/kgCM |
| Urea substitution                      | 1.47161E-05 | L/kgCM   |

| Table E11.2                            |             |          |
|----------------------------------------|-------------|----------|
| <b><u>Pretreatment</u></b>             |             |          |
| <b><u>Substrate formulation</u></b>    |             |          |
| Distilled water                        | 1.228063855 | ̄L/kgCM  |
| <b><u>Chemical agent</u></b>           |             |          |
| NaOH                                   | 0.0186      | ̄kg/kgCM |
| <b><u>Heating</u></b>                  |             |          |
| Electricity                            | 473.0834562 | kJ/kgCM  |
| <b><u>Anaerobic Digestion</u></b>      |             |          |
| <b><u>Mixture</u></b>                  |             |          |
| Inoculum                               | 4.033333333 | ̄L/kgCM  |
| FVW                                    | 1.292735043 | kg/kgCM  |
| <b><u>Heating</u></b>                  |             |          |
| Electricity                            | 422.188256  | ̄kJ/kgCM |
| <b><u>Effluent</u></b>                 |             |          |
| Digestate                              | 8.066666667 | ̄L/kgCM  |
| <b><u>Methane production</u></b>       |             |          |
| Methane                                | 12.0048     | ̄L/kg CM |
| CH <sub>4</sub> emissions              | 0.000171497 | kg/kgCM  |
|                                        | 0.000171497 |          |
| Electric production                    | 266.866704  | kJ/kgCM  |
| Heat production                        | 143.697456  | kJ/kgCM  |
| <b><u>Biofertilizer production</u></b> |             |          |
| <b><u>Drying</u></b>                   |             |          |
| Electricity                            | 235.7017259 | ̄kJ/kgCM |
| N emitted as NH <sub>3</sub>           | 4.52276E-09 | kg/kgCM  |
| N emitted as N <sub>2</sub> O          | 5.27655E-09 | kg/kgCM  |
| <b><u>Biofertilizer</u></b>            |             |          |
| Total Nitrogen                         | 3.76897E-06 | ̄kg/kgCM |
| Urea substitution                      | 8.17563E-09 | L/kgCM   |

| Table E12.2                            |            |           |
|----------------------------------------|------------|-----------|
| <b>Pretreatment</b>                    |            |           |
| <b><u>Substrate formulation</u></b>    |            |           |
| Distilled water                        | 29.4613972 | ̄ L/kgCM  |
| <b><u>Chemical agent</u></b>           |            |           |
| NaOH                                   | 0.018      | ̄ kg/kgCM |
| <b><u>Heating</u></b>                  |            |           |
| Electricity                            | 473.08714  | kJ/kgCM   |
| <b><u>Anaerobic Digestion</u></b>      |            |           |
| <b><u>Mixture</u></b>                  |            |           |
| Inoculum                               | 10.0833333 | ̄ L/kgCM  |
| FVW                                    | 51.7094017 | kg/kgCM   |
| <b><u>Heating</u></b>                  |            |           |
| Electricity                            | 1055.76799 | ̄ kJ/kgCM |
| <b><u>Effluent</u></b>                 |            |           |
| Digestate                              | 20.1666667 | ̄ L/kgCM  |
| <b><u>Methane production</u></b>       |            |           |
| Methane                                | 12.7116    | ̄ L/kg CM |
| CH <sub>4</sub> emissions              | 0.00018159 | kg/kgCM   |
| <br>                                   |            |           |
| Electric production                    | 282.578868 | kJ/kgCM   |
| Heat production                        | 152.157852 | kJ/kgCM   |
| <b><u>Biofertilizer production</u></b> |            |           |
| <b><u>Drying</u></b>                   |            |           |
| Electricity                            | 589.254315 | ̄ kJ/kgCM |
| N emitted as NH <sub>3</sub>           | 1.2061E-05 | kg/kgCM   |
| N emitted as N <sub>2</sub> O          | 1.4071E-05 | kg/kgCM   |
| <b><u>Biofertilizer</u></b>            |            |           |
| Total Nitrogen                         | 0.01005058 | ̄ kg/kgCM |
| Urea substitution                      | 2.1802E-05 | L/kgCM    |

| Table E13.2                            |             |           |
|----------------------------------------|-------------|-----------|
| <b>Pretreatment</b>                    |             |           |
| <b><u>Substrate formulation</u></b>    |             |           |
| Distilled water                        | 1.951995479 | ̄ L/kgCM  |
| <b><u>Chemical agent</u></b>           |             |           |
| NaOH                                   | 0.018       | ̄ kg/kgCM |
| <b><u>Heating</u></b>                  |             |           |
| Electricity                            | 473.0846843 | kJ/kgCM   |
| <b><u>Anaerobic Digestion</u></b>      |             |           |
| <b><u>Mixture</u></b>                  |             |           |
| Inoculum                               | 6.05        | ̄ L/kgCM  |
| FVW                                    | 2.585470085 | kg/kgCM   |
| <b><u>Heating</u></b>                  |             |           |
| Electricity                            | 380.5363366 | ̄ kJ/kgCM |
| <b><u>Effluent</u></b>                 |             |           |
| Digestate                              | 12.1        | ̄ L/kgCM  |
| <b><u>Methane production</u></b>       |             |           |
| Methane                                | 15.8368     | ̄ L/kg CM |
| CH <sub>4</sub> emissions              | 0.00022624  | kg/kgCM   |
| <br>                                   |             |           |
| Electric production                    | 352.052064  | kJ/kgCM   |
| Heat production                        | 189.566496  | kJ/kgCM   |
| <b><u>Biofertilizer production</u></b> |             |           |
| <b><u>Drying</u></b>                   |             |           |
| Electricity                            | 353.5525889 | ̄ kJ/kgCM |
| N emitted as NH <sub>3</sub>           | 7.23642E-06 | kg/kgCM   |
| N emitted as N <sub>2</sub> O          | 8.44249E-06 | kg/kgCM   |
| <b><u>Biofertilizer</u></b>            |             |           |
| Total Nitrogen                         | 0.006030348 | ̄ kg/kgCM |
| Urea substitution                      | 1.3081E-05  | L/kgCM    |

| Table E14.2                            |             |          |
|----------------------------------------|-------------|----------|
| <b>Pretreatment</b>                    |             |          |
| <b><u>Substrate formulation</u></b>    |             |          |
| Distilled water                        | 1.951995479 | ̄L/kgCM  |
| <b><u>Chemical agent</u></b>           |             |          |
| NaOH                                   | 0.0186      | ̄kg/kgCM |
| <b><u>Heating</u></b>                  |             |          |
| Electricity                            | 473.0846843 | kJ/kgCM  |
| <b><u>Anaerobic Digestion</u></b>      |             |          |
| <b><u>Mixture</u></b>                  |             |          |
| Inoculum                               | 6.05        | ̄L/kgCM  |
| FVW                                    | 2.585470085 | kg/kgCM  |
| <b><u>Heating</u></b>                  |             |          |
| Electricity                            | 886.2643603 | ̄kJ/kgCM |
| <b><u>Effluent</u></b>                 |             |          |
| Digestate                              | 12.1        | ̄L/kgCM  |
| <b><u>Methane production</u></b>       |             |          |
| Methane                                | 13.4752     | ̄L/kg CM |
| CH <sub>4</sub> emissions              | 0.000192503 | kg/kgCM  |
| <br>                                   |             |          |
| Electric production                    | 299.553696  | kJ/kgCM  |
| Heat production                        | 161.298144  | kJ/kgCM  |
| <b><u>Biofertilizer production</u></b> |             |          |
| <b><u>Drying</u></b>                   |             |          |
| Electricity                            | 353.5525889 | ̄kJ/kgCM |
| N emitted as NH <sub>3</sub>           | 8.14097E-06 | kg/kgCM  |
| N emitted as N <sub>2</sub> O          | 9.4978E-06  | kg/kgCM  |
| <b><u>Biofertilizer</u></b>            |             |          |
| Total Nitrogen                         | 0.006784141 | ̄kg/kgCM |
| Urea substitution                      | 1.47161E-05 | L/kgCM   |

| Table E15.2                            |             |          |
|----------------------------------------|-------------|----------|
| <b>Pretreatment</b>                    |             |          |
| <b><u>Substrate formulation</u></b>    |             |          |
| Distilled water                        | 1.951995479 | ̄L/kgCM  |
| <b><u>Chemical agent</u></b>           |             |          |
| NaOH                                   | 0.0186      | ̄kg/kgCM |
| <b><u>Heating</u></b>                  |             |          |
| Electricity                            | 473.0846843 | kJ/kgCM  |
| <b><u>Anaerobic Digestion</u></b>      |             |          |
| <b><u>Mixture</u></b>                  |             |          |
| Inoculum                               | 6.05        | ̄L/kgCM  |
| FVW                                    | 2.585470085 | kg/kgCM  |
| <b><u>Heating</u></b>                  |             |          |
| Electricity                            | 633.4003484 | ̄kJ/kgCM |
| <b><u>Effluent</u></b>                 |             |          |
| Digestate                              | 12.1        | ̄L/kgCM  |
| <b><u>Methane production</u></b>       |             |          |
| Methane                                | 11.4832     | ̄L/kg CM |
| CH <sub>4</sub> emissions              | 0.000164046 | kg/kgCM  |
| <br>                                   |             |          |
| Electric production                    | 255.271536  | kJ/kgCM  |
| Heat production                        | 137.453904  | kJ/kgCM  |
| <b><u>Biofertilizer production</u></b> |             |          |
| <b><u>Drying</u></b>                   |             |          |
| Electricity                            | 353.5525889 | ̄kJ/kgCM |
| N emitted as NH <sub>3</sub>           | 2.04372E-05 | kg/kgCM  |
| N emitted as N <sub>2</sub> O          | 2.38434E-05 | kg/kgCM  |
| <b><u>Biofertilizer</u></b>            |             |          |
| Total Nitrogen                         | 0.017031021 | ̄kg/kgCM |
| Urea substitution                      | 3.69436E-05 | L/kgCM   |
